# Supplementary material for: Facile fabrication of a phosphonium-based ionic liquid impregnated chitosan adsorbent for the recovery of hexavalent chromium
Source: Royal Society of Chemistry journal article supplement (doi:10.1039/d2ra00064d), 2022-01-01
Supplement: d2ra00064d1.pdf [file d2ra00064d1.pdf]

## SUPPLEMENTARY INFORMATION

### Facile fabrication of phosphonium-based ionic liquid impregnated chitosan adsorbent for the recovery of hexavalent chromium

Mochamad Lutfi Firmansyah\*, Thalabul Ilmi, Rino Rakhmata Mukti, Patmawati, and Masahiro Goto

Table S1. Breakthrough curve models parameter of Pd(II) adsorption

| $C_i$<br>[mg L <sup>-1</sup> ] | $Q$<br>[mL min <sup>-1</sup> ] | $Z$<br>cm | Chitosan    |             |             |        | Chi_IL      |             |             |        |
|--------------------------------|--------------------------------|-----------|-------------|-------------|-------------|--------|-------------|-------------|-------------|--------|
|                                |                                |           | Thomas      |             | Yoon-Nelson |        | Thomas      |             | Yoon-Nelson |        |
|                                |                                |           | $q_{e,exp}$ | $q_{e,cal}$ | $t_{0.5}$   | $\tau$ | $q_{e,exp}$ | $q_{e,cal}$ | $t_{0.5}$   | $\tau$ |
| 50                             | 5                              | 4         | 114         | 115         | 900         | 890    | 206         | 201         | 1060        | 1080   |
| 50                             | 5                              | 5         | 67          | 64          | 800         | 810    | 114         | 118         | 1180        | 1160   |
| 50                             | 5                              | 6         | 45          | 44          | 710         | 720    | 74          | 71          | 1240        | 1250   |
| 50                             | 5                              | 6         | 45          | 44          | 710         | 720    | 74          | 71          | 1240        | 1250   |
| 50                             | 10                             | 6         | 51          | 54          | 660         | 670    | 104         | 105         | 1010        | 1000   |
| 50                             | 15                             | 6         | 54          | 58          | 450         | 460    | 109         | 106         | 660         | 670    |
| 50                             | 5                              | 6         | 45          | 44          | 710         | 720    | 74          | 71          | 1240        | 1250   |
| 100                            | 5                              | 6         | 46          | 47          | 620         | 600    | 75          | 75          | 800         | 800    |
| 200                            | 5                              | 6         | 47          | 56          | 420         | 400    | 86          | 87          | 490         | 500    |

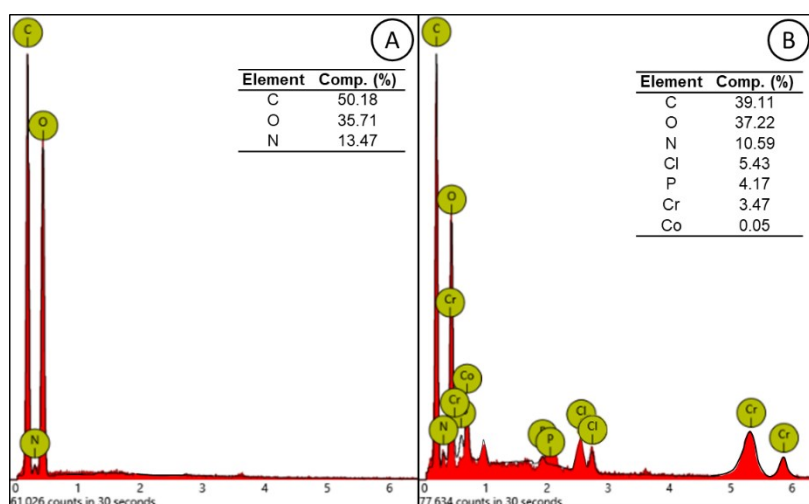

**Figure S1.** EDX spectra of (A) Unmodified chitosan and (B) post-adsorption Chi\_IL

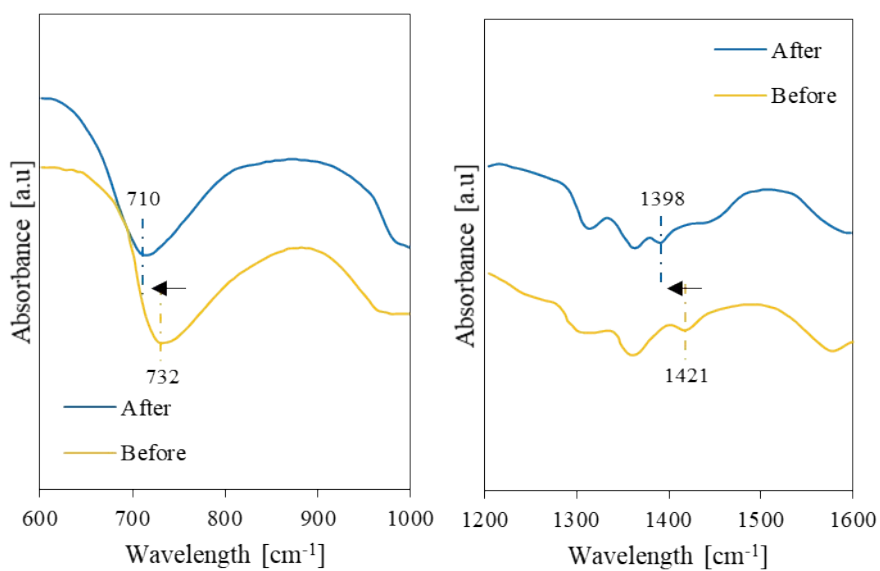

**Figure S2.** FTIR spectrum of Chi\_IL pre and post adsorption of Cr(VI)

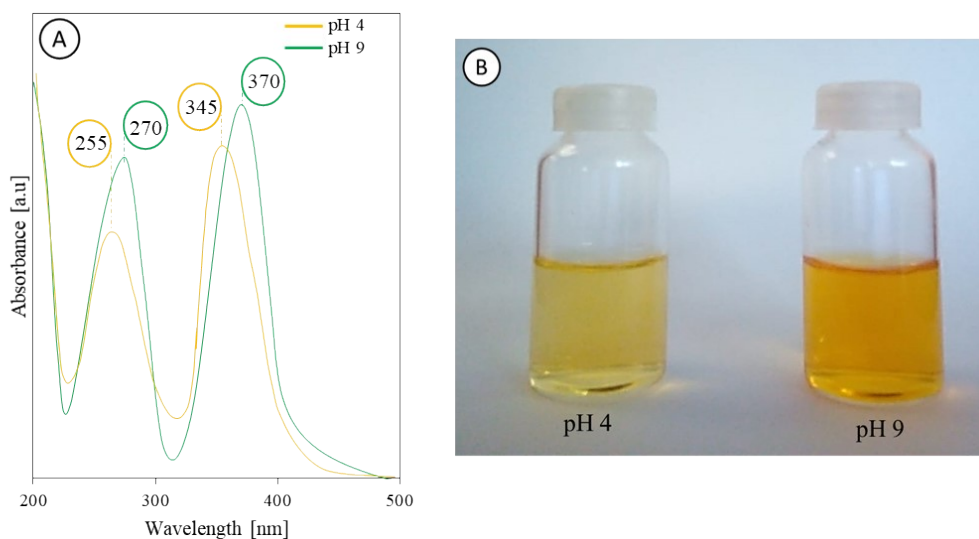

**Figure S3.** (A) UV-vis spectra and (B) visual observation of Cr(VI)-containing solution in different pH

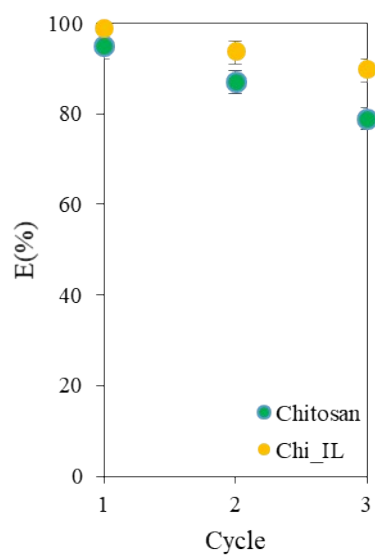

**Figure S4.** Regeneration performance of Chitosan and Chi-IL over Cr(VI) adsorption

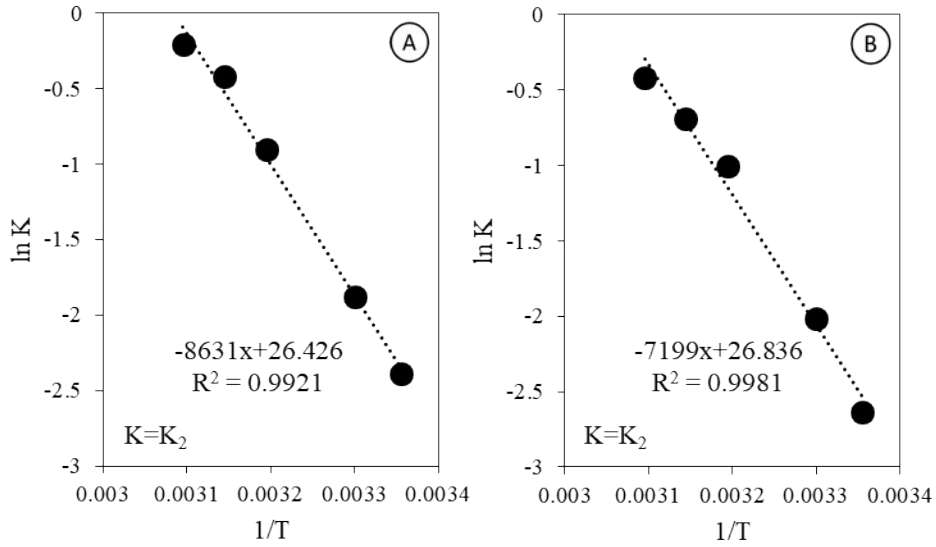

**Figure S5.** Arrhenius plot between  $\ln K$  ( $K_2$ ) vs  $1/T$  for (A) Chi\_IL and (B) Chitosan.

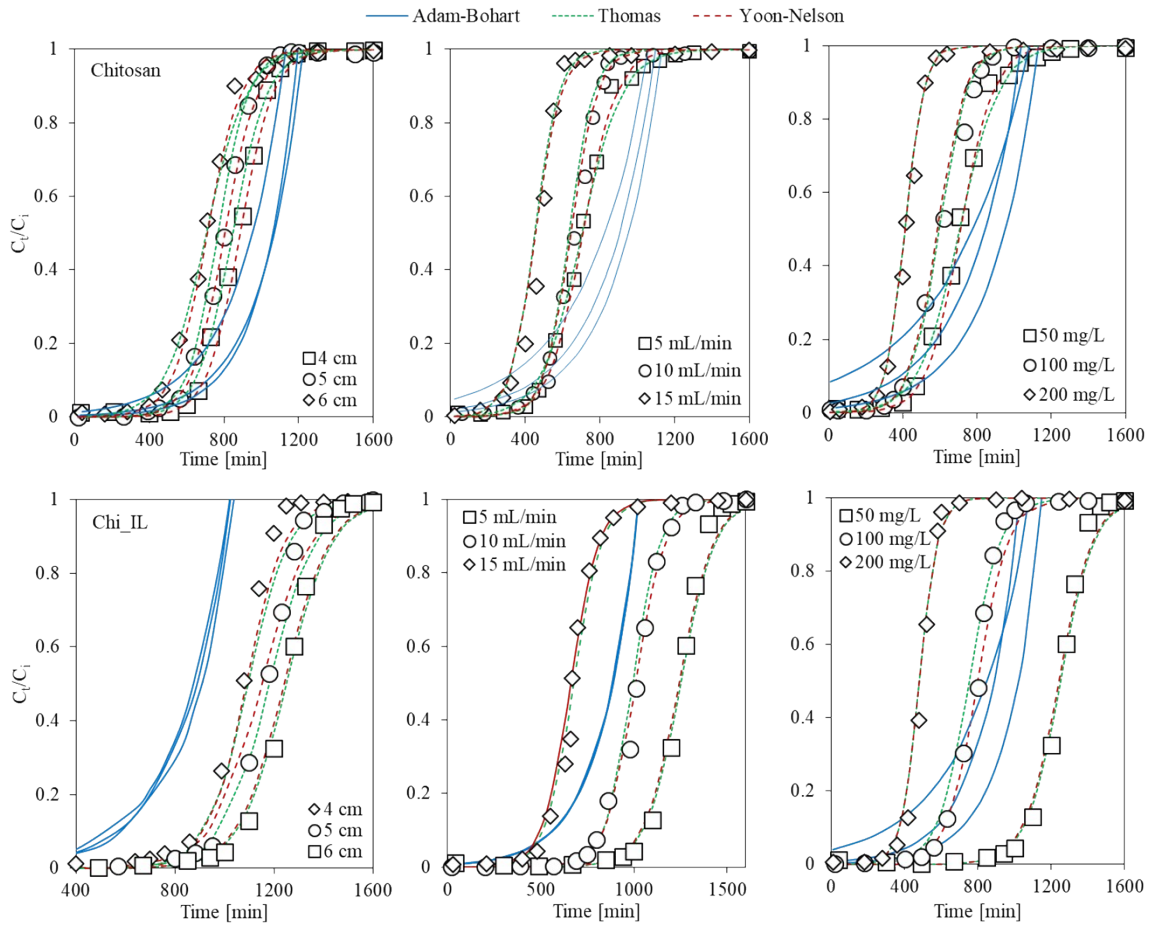

**Figure S6.** Column adsorption fitting between model and experimental for Chitosan and Chi\_IL.
